# Supplementary material for: Levoketoconazole treatment in endogenous Cushing’s syndrome: extended evaluation of clinical, biochemical, and radiologic outcomes
Source: PubMed Central journal article supplement (PMC9716395; doi:10.1530/eje-22-0506), 2022-10-17
Supplement: supplementary_table_1.pdf [file supplementary_table_1.pdf]

**Supplementary Table S1. Study Sites and Corresponding Independent Ethics Committees**

| Country        | Site Number | PI                | Role                               | Site Name                                                                                              | CEC                                                                                                                     | LEC                                                                                                                                                                                |
|----------------|-------------|-------------------|------------------------------------|--------------------------------------------------------------------------------------------------------|-------------------------------------------------------------------------------------------------------------------------|------------------------------------------------------------------------------------------------------------------------------------------------------------------------------------|
| Belgium        | 3201        | Bex, Marie        | National Coordinating Investigator | University Hospitals Leuven                                                                            | Commissie Medische Ethiek<br>UZ KU Leuven / Onderzoek<br>U.Z. Gasthuisberg<br>Herestraat 49<br>B 3000 Leuven<br>Belgium | N/A                                                                                                                                                                                |
| Belgium        | 3202        | Velkeniers        | Principal Investigator             | Universitair Ziekenhuis Brussel                                                                        | Commissie Medische Ethiek<br>UZ KU Leuven / Onderzoek<br>U.Z. Gasthuisberg<br>Herestraat 49<br>B 3000 Leuven<br>Belgium | Vrije Universiteit Brussel<br>Commissie Medische Ethiek<br>Reflectiegroep Biomedische Ethiek<br>Laarbeeklaan 101<br>1090 Brussel<br>Belgium                                        |
| Bulgaria       | 3501        | Zaharieva, Sabina | Principal Investigator             | University Specialized Hospital for Active Treatment in Endocrinology (USHATE)<br>"Acad. Ivan Penchev" | Ethics Committee for Multicenter Clinical Trials<br>Ministry of Health<br>5 Sveta Nedelia Sq<br>Sofia, Bulgaria 1000    | N/A                                                                                                                                                                                |
| Canada         | 2003        | Chik, Constance   | Principal Investigator             | University of Alberta                                                                                  | N/A                                                                                                                     | Health Research Ethics Board<br>308 Campus Tower<br>University of Alberta<br>Edmonton, Alberta<br>T6G 1K8, Canada                                                                  |
| Canada         | 2001        | Lacroix, Andre    | Principal Investigator             | Centre hospitalier de l'Université de Montréal (CHUM)                                                  | N/A                                                                                                                     | Comité d'éthique de la recherche de CHUM<br>Pavillon R, 900 rue St.-Denis, 3e étage<br>Montréal, QC<br>H2X 0A9, Canada<br>CHUM                                                     |
| Canada         | 2002        | Ur, Ehud          | Principal Investigator             | St. Pauls Hospital/Vancouver General Hospital                                                          | N/A                                                                                                                     | The University of British Columbia<br>Office of Research (Services) Ethics<br>Clinical Research Ethics Board – Room 210, 828 West 10th Avenue,<br>Vancouver, BC<br>V5Z 1L8, Canada |
| Czech Republic | 4201        | Cap, Jan          | National Coordinating Investigator | University Hospital Hradec Kralove                                                                     | Etická komise<br>Fakultní nemocnice Hradec Králové<br>Sokolská 581<br>500 05 Hradec Králové<br>Czech Republic           | N/A                                                                                                                                                                                |
| Czech Republic | 4202        | Hana, Vaclav      | Principal Investigator             | Vseobecná fakultní nemocnice v Praze – III. Interní klinika VFN a 1. LF UK                             | Etická komise<br>Fakultní nemocnice Hradec Králové<br>Sokolská 581<br>500 05 Hradec Králové<br>Czech Republic           | Etická komise VFN<br>Na Bojišti 1<br>Prague, Czech Republic 128 08                                                                                                                 |
| Czech Republic | 4203        | Krsek, Michal     | Principal Investigator             | Fakultní nemocnice Královské Vinohrady, Prague                                                         | Etická komise<br>Fakultní nemocnice Hradec Králové<br>Sokolská 581<br>500 05 Hradec Králové<br>Czech Republic           | Etická komise Fakultní nemocnice Královské Vinohrady<br>Šrobárova 1150/50, 100 34 Praha 10<br>Czech Republic                                                                       |

| Country | Site Number | PI                    | Role                               | Site Name                                                                              | CEC                                                                                                                                                                                   | LEC |
|---------|-------------|-----------------------|------------------------------------|----------------------------------------------------------------------------------------|---------------------------------------------------------------------------------------------------------------------------------------------------------------------------------------|-----|
| Denmark | 4505        | Andersen, Marianne    | Principal Investigator             | Odense Universitets Hospital                                                           | Committees on Biomedical Research Ethics of the Capital Region<br>Regionsgården<br>Kongens Vænge 2<br>Hillerod, Denmark 3400                                                          | N/A |
| Denmark | 4501        | Feldt-Rasmussen, Ulla | National Coordinating Investigator | Rigshospitalet, Copenhagen University Hospital                                         | Center for Health, the Committees on Health Research Ethics<br>Kongens Vaenge 2<br>Hillerod, Denmark 3400                                                                             | N/A |
| Denmark | 4504        | Kistorp, Caroline     | Principal Investigator             | Herlev Hospital                                                                        | Center for Health, the Committees on Health Research Ethics<br>Kongens Vaenge 2<br>Hillerod, Denmark 3400                                                                             | N/A |
| Denmark | 4502        | Poulsen, Løgstrup     | Principal Investigator             | Aarhus University Hospital                                                             | Committees on Biomedical Research Ethics of the Capital Region<br>Regionsgården<br>Kongens Vænge 2<br>Hillerod, Denmark 3400                                                          | N/A |
| France  | 3304        | Brue, Thierry         | National Coordinating Investigator | Hôpital de la CONCEPTION<br>Service d'Endocrinologie, Diabète et Maladies Métaboliques | Center for Health, Region Hovedstaden, Ethics Committee<br>Kongens Vaenge 2<br>Hillerod, Denmark 3400                                                                                 | NA  |
| France  | 3302        | Chabre, Olivier       | Principal Investigator             | CHU de Grenoble, Hôpital Nord,<br>Service d'Endocrinologie-Diabétologie-Nutrition      | Comité de Protection des Personnes Ile de France VIII<br>Hôpital Ambroise Paré<br>Bâtiment d'Anatomopathologie<br>9, avenue Charles de Gaulle<br>92100 Boulogne-Billancourt<br>France | NA  |
| France  | 3307        | Delemer, Brigitte     | Principal Investigator             | Hôpital Robert-Debré                                                                   | Comité de Protection des Personnes Ile de France VIII<br>Hôpital Ambroise Paré<br>Bâtiment d'Anatomopathologie<br>9, avenue Charles de Gaulle<br>92100 Boulogne-Billancourt<br>France | N/A |
| France  | 3306        | Goichot, Bernard      | Principal Investigator             | Hôpital de Hautepierre                                                                 | Comité de Protection des Personnes Ile de France VIII<br>Hôpital Ambroise Paré<br>Bâtiment d'Anatomopathologie<br>9, avenue Charles de Gaulle<br>92100 Boulogne-Billancourt<br>France | N/A |
| France  | 3303        | Tabarin, Antoine      | Principal Investigator             | CHU de Bordeaux, USN Haut-Levêque                                                      | Comité de Protection des Personnes Ile de France VIII<br>Hôpital Ambroise Paré<br>Bâtiment d'Anatomopathologie<br>9, avenue Charles de Gaulle<br>92100 Boulogne-Billancourt<br>France | N/A |

| Country | Site Number | PI                     | Role                               | Site Name                                                           | CEC                                                                                                                                                                                   | LEC                                                                                                                                                     |
|---------|-------------|------------------------|------------------------------------|---------------------------------------------------------------------|---------------------------------------------------------------------------------------------------------------------------------------------------------------------------------------|---------------------------------------------------------------------------------------------------------------------------------------------------------|
| France  | 3305        | Touraine, Philippe     | Principal Investigator             | Hôpitaux Universitaires Pitié Salpêtrière Charles Foix              | Comité de Protection des Personnes Ile de France VIII<br>Hôpital Ambroise Paré<br>Bâtiment d'Anatomopathologie<br>9, avenue Charles de Gaulle<br>92100 Boulogne-Billancourt<br>France | N/A                                                                                                                                                     |
| Germany | 4905        | Brabant, Georg         | Principal Investigator             | Med Clinic I - University of Lueback                                | Ethikkommission bei der Medizinischen<br>Fakultät der Universität Würzburg<br>Institut für Pharmakologie und Toxikologie<br>Versbacher Str. 9<br>D-97078 Würzburg, Germany            | Ethikkommission der Universität zu Lübeck<br>Ratzeburger Allee 160<br>D-23538 Lübeck, Germany                                                           |
| Germany | 4901        | Hahner, Stefanie       | National Coordinating Investigator | University of Hospital Wuerzburg                                    | Ethikkommission bei der Medizinischen<br>Fakultät der Universität Würzburg<br>Institut für Pharmakologie und Toxikologie<br>Versbacher Str. 9<br>D-97078 Würzburg, Germany            | N/A                                                                                                                                                     |
| Germany | 4903        | Schopohl, Jochen       | Principal Investigator             | Klinikum der LMU                                                    | Ethikkommission bei der Medizinischen<br>Fakultät der Universität Würzburg<br>Institut für Pharmakologie und Toxikologie<br>Versbacher Str. 9<br>D-97078 Würzburg, Germany            | Ethics Committee<br>Medical Faculty of the LMU München<br>Pettenkoferstr. 8a<br>80336 München, Germany                                                  |
| Germany | 4902        | Stalla, Günter         | Principal Investigator             | Max-Planck-Institute of Psychiatry                                  | Ethikkommission bei der Medizinischen<br>Fakultät der Universität Würzburg<br>Institut für Pharmakologie und Toxikologie<br>Versbacher Str. 9<br>D-97078 Würzburg, Germany            | Ethics Committee<br>Medical Faculty of the LMU München<br>Pettenkoferstr. 8a<br>80336 München, Germany                                                  |
| Germany | 4904        | Strasburger, Christian | Principal Investigator             | Charité University Medicine Berlin                                  | Ethikkommission bei der Medizinischen<br>Fakultät der Universität Würzburg<br>Institut für Pharmakologie und Toxikologie<br>Versbacher Str. 9<br>D-97078 Würzburg, Germany            | Charité - Universitätsmedizin Berlin<br>CCM: Campus Charité Mitte<br>Ethics Commission<br>Committee's Office<br>Charitéplatz 1<br>10117 Berlin, Germany |
| Georgia | 5001        | Metreveli, David       | Principal Investigator             | David Metreveli Medical Clinic                                      | N/A                                                                                                                                                                                   | Ethics Committee<br>Tbilisi 0144 Tsinandali St. # 9;<br>Georgia                                                                                         |
| Hungary | 3601        | Kovács, László         | National Coordinating Investigator | MH- Egészségügyi Központ                                            | Medical Research Council Ethic Committee for Clinical<br>Pharmacology (ETT_KFEB)<br>Arany Janos u. 6-8<br>Budapest, Hungary H-1051                                                    | N/A                                                                                                                                                     |
| Hungary | 3602        | Toth, Miklós           | Principal Investigator             | Semmelweis University                                               | Medical Research Council Ethics Committee for Clinical<br>Pharmacology (ECCP)<br>Arany Janos utca 6-8<br>Budapest, Hungary H-1051                                                     | N/A                                                                                                                                                     |
| Israel  | 9724        | Adawi, Faiad           | Principal Investigator             | Ziv Medical Center                                                  | N/A                                                                                                                                                                                   | Ziv Medical Center Ethics Committee, Derech Rambam, Safed,<br>Israel 13100                                                                              |
| Israel  | 9722        | Greenman, Yona         | Principal Investigator             | Sourasky Medical Center                                             | N/A                                                                                                                                                                                   | Helsinki Committee, Tel Aviv Sourasky Medical Centre,<br>6 Weizman Street, Tel Aviv, Israel 64239                                                       |
| Israel  | 9723        | Saiegh, Leonard        | Principal Investigator             | Bnai Zion Medical Center<br>Institute of Endocrinology & Metabolism | N/A                                                                                                                                                                                   | Helsinki Committee of Bnai Zion MC,<br>47 Golomb, Haifa, Israel 3104802                                                                                 |
| Country | Site Number | PI                     | Role                               | Site Name                                                           | CEC                                                                                                                                                                                   | LEC                                                                                                                                                     |

|        |      |                           |                                    |                                                                                                               |                                                                                                                              |                                                                                                                                                                  |
|--------|------|---------------------------|------------------------------------|---------------------------------------------------------------------------------------------------------------|------------------------------------------------------------------------------------------------------------------------------|------------------------------------------------------------------------------------------------------------------------------------------------------------------|
| Israel | 9721 | Shimon, Ilan              | Principal Investigator             | Institute of Endocrinology & Metabolism<br>Rabin Medical Center, Beilinson Campus                             | N/A                                                                                                                          | Rabin Medical Center<br>39 Jabotinski Street<br>Petach Tiqva, Israel 49100                                                                                       |
| Italy  | 3901 | Arnaldi, Giorgio          | National Coordinating Investigator | Azienda Ospedaliera-Universitaria Ancona                                                                      | Comitato Etico Regionale delle Marche<br>Azienda Ospedaliero Universitaria Ancona<br>via Conca 71<br>Ancona, Italy 60126     | N/A                                                                                                                                                              |
| Italy  | 3907 | Cannavò, Salvatore        | Principal Investigator             | UOC di Endocrinologia<br>Dipartimento di Medicina Clinica e Sperimentale<br>Università degli Studi di Messina | Comitato Etico di Messina<br>AOU Policlinico G. Martino<br>via Consolare Valeria 1<br>Messina, Italy 98125                   | Spettabile<br>Comitato Etico<br>Policlinico G. Martino<br>Via Consolare Valeria 1<br>Messina, Italy 98125                                                        |
| Italy  | 3908 | Ferone, Diego             | Principal Investigator             | University of Genova                                                                                          | Comitato Etico Regionale<br>Largo Rosanna Benzi, 10<br>Genoa, Liguria, Italy 16132                                           | Spettabile<br>Comitato Etico<br>IRCCS AOU San Martino<br>Largo R. Benzi 10<br>Genova, Italy 16132                                                                |
| Italy  | 3906 | Giordano, Roberta         | Principal Investigator             | Azienda Ospedaliero – Universitaria<br>Città della Salute e della Scienza di Torino                           | Azienda Ospedaliero Universitaria Ospedali Riuniti Umberto I- G.M. Lancisi- G. Salesi<br>via Conca 71<br>Ancona, Italy 60126 | Spettabile<br>Comitato Etico<br>Città della Salute e della Scienza<br>padiglione beige, 3° piano (ex Casa Suore)<br>Corso Bramante, 88/90<br>Torino, Italy 10126 |
| Italy  | 3910 | Loli, Paola               | Principal Investigator             | ASST Grande Ospedale Metropolitano Niguarda                                                                   | Azienda Ospedaliero Universitaria Ospedali Riuniti Umberto I- G.M. Lancisi- G. Salesi<br>via Conca 71<br>Ancona, Italy 60126 | Spettabile<br>Comitato Etico<br>ASST Grande Ospedale Metropolitano Niguarda<br>Padiglione 7 – 4° Piano<br>Piazza Ospedale Maggiore 3<br>Milano, Italy 20162      |
| Italy  | 3909 | Davi, Maria               | Principal Investigator             | Policlinico GB Rossi                                                                                          | Azienda Ospedaliero Universitaria Ospedali Riuniti Umberto I- G.M. Lancisi- G. Salesi<br>via Conca 71<br>Ancona, Italy 60126 | Spettabile Comitato Etico c/o Servizio di Farmacia<br>dell'Ospedale Borgo Trento P.le Stefani 1,<br>Verona, Italy 37126                                          |
| Italy  | 3913 | Mannelli, Massimo         | Principal Investigator             | Mario Serio University of Florence                                                                            | Azienda Ospedaliero Universitaria Ospedali Riuniti Umberto I- G.M. Lancisi- G. Salesi<br>via Conca 71<br>Ancona, Italy 60126 | Comitato Etico Area Vasta Centro, Universitaria Careggi, Largo<br>Brambilla 3,<br>Firenze, Italy 50134                                                           |
| Italy  | 3905 | Pecori Giraldi, Francesca | Principal Investigator             | Istituto Auxologico Italiano                                                                                  | Azienda Ospedaliero Universitaria Ospedali Riuniti Umberto I- G.M. Lancisi- G. Salesi<br>via Conca 71<br>Ancona, Italy 60126 | Comitato Etico, Istituto Auxologico Italiano,<br>via L. Ariosto, 13,<br>Milan, Italy 20145                                                                       |
| Italy  | 3903 | Pivonello, Rosario        | Principal Investigator             | University of Naples Federico II                                                                              | Azienda Ospedaliero Universitaria Ospedali Riuniti Umberto I- G.M. Lancisi- G. Salesi<br>via Conca 71<br>Ancona, Italy 60126 | Comitato Etico Per le Attività Biomediche Università "Federico II", Via Sergio Pansini, 5,<br>Naples, Italy 80131                                                |
| Italy  | 3911 | Pontecorvi, Alfredo       | Principal Investigator             | Institute of Medical Pathology                                                                                | Azienda Ospedaliero Universitaria Ospedali Riuniti Umberto I- G.M. Lancisi- G. Salesi<br>via Conca 71<br>Ancona, Italy 60126 | Comitato Etico Policlinico Agostino Gemelli Università Cattolica del Sacro Cuore, Largo Agostino Gemelli 8, Roma, Italy 00168                                    |

| Country     | Site Number | PI                         | Role                               | Site Name                                                                                                | CEC                                                                                                                            | LEC                                                                                                                                                                                             |
|-------------|-------------|----------------------------|------------------------------------|----------------------------------------------------------------------------------------------------------|--------------------------------------------------------------------------------------------------------------------------------|-------------------------------------------------------------------------------------------------------------------------------------------------------------------------------------------------|
| Italy       | 3904        | Scaroni, Carla             | Principal Investigator             | University of Padua                                                                                      | Azienda Ospedaliero Universitaria Ospedali Riuniti Umberto I- G.M. Lancisi- G. Salesi<br>via Conca 71<br>Ancona, Italy 60126   | Comitato Etico per la Sperimentazione Clinica della Provincia di Padova, Via Giustiniani 1,<br>Padova, Italy 35128                                                                              |
| Italy       | 3902        | Terzolo, Massimo           | Principal Investigator             | SCDU Medicina Interna I Università di Torino                                                             | Azienda Ospedaliero Universitaria Ospedali Riuniti Umberto I- G.M. Lancisi- G. Salesi<br>Via Conca n.71<br>Ancona, Italy 60126 | Spettabile<br>Comitato Etico<br>A.O.U. S. Luigi Gonzaga<br>Regione Gonzole 10<br>10043 Orbassano (TO)<br>Italy                                                                                  |
| Italy       | 3912        | Toscano, Vincenzo          | Principal Investigator             | UOC Endocrinologia                                                                                       | Azienda Ospedaliero Universitaria Ospedali Riuniti Umberto I- G.M. Lancisi- G. Salesi<br>Via Conca n.71<br>Ancona, Italy 60126 | Spettabile<br>Ufficio locale Sperimentazioni Cliniche<br>Comitato Etico dell'Università 'Sapienza'<br>c/o Azienda Ospedaliera Sant' Andrea<br>Via di Grottarossa 1035-1039<br>Roma, Italy 00189 |
| Netherlands | 3102        | Biermasz, Nienke Ruurdje   | Principal Investigator             | Leiden University, Leiden University Medical Center                                                      | Medisch Ethische Toetsings Commissie van het ErasmusMC 's Gravendijkwal 230<br>Rotterdam, Netherlands 3015 CE                  | N/A                                                                                                                                                                                             |
| Netherlands | 3101        | Feelders, Richard          | National Coordinating Investigator | Erasmus MC                                                                                               | Medisch Ethische Toetsings Commissie van het ErasmusMC 's Gravendijkwal 230<br>Rotterdam, Netherlands 3015 CE                  | N/A                                                                                                                                                                                             |
| Poland      | 4801        | Bolanowski, Marek          | Principal Investigator             | Samodzielny Publiczny Szpital Kliniczny Nr 1                                                             | Bioethics Committee at the Polish Mother's Memorial Hospital Research Institute Rzgowska 281/289<br>Lodz, Poland 93338         | N/A                                                                                                                                                                                             |
| Poland      | 4803        | Lewinski, Andrzej          | National Coordinating Investigator | Instytut Centrum Zdrowia Matki Polki                                                                     | Bioethics Committee at the Polish Mother's Memorial Hospital Research Institute Rzgowska 281/289<br>Lodz, Poland 93338         | N/A                                                                                                                                                                                             |
| Poland      | 4802        | Matyjaszek-Matuszek, Beata | Principal Investigator             | Terpa Sp.z.o.o                                                                                           | Bioethics Committee at the Polish Mother's Memorial Hospital Research Institute Rzgowska 281/289<br>Lodz, Poland 93338         | N/A                                                                                                                                                                                             |
| Poland      | 4805        | Ruchala, Marek             | Principal Investigator             | Szpital Kliniczny im. Heliodora Swieckiego Uniwersytetu Medycznego im. Karola Marcinkowskiego w Poznaniu | Bioethics Committee at the Polish Mother's Memorial Hospital Research Institute Rzgowska 281/289<br>Lodz, Poland 93338         | N/A                                                                                                                                                                                             |
| Poland      | 4804        | Witek, Przemyslaw          | Principal Investigator             | Outpatient Clinic: Reuma Centrum                                                                         | Bioethics Committee at the Polish Mother's Memorial Hospital Research Institute Rzgowska 281/289<br>Lodz, Poland 93338         | N/A                                                                                                                                                                                             |
| Serbia      | 3802        | Medic-Stojanoska, Milica   | Principal Investigator             | Clinical Center of Vojvodina<br>Clinic for Endocrinology, Diabetes and Metabolic Diseases                | N/A                                                                                                                            | Local Ethics Committee of the Clinical Center of Vojvodina<br>Clinical Center of Vojvodina<br>Hajduk Veljkova 1-11<br>Novi Sad, Serbia 21000                                                    |
| Serbia      | 3801        | Pekic-Djurdjevic, Sandra   | Principal Investigator             | Clinical Center of Serbia                                                                                | N/A                                                                                                                            | Local Ethics Committee of the Clinical Center of Serbia<br>Clinical Center of Serbia<br>Pasterova 2<br>Belgrade, Serbia 11000                                                                   |

| Country     | Site Number | PI                           | Role                               | Site Name                                                | CEC                                                                                                                                                                                                                                                                          | LEC |
|-------------|-------------|------------------------------|------------------------------------|----------------------------------------------------------|------------------------------------------------------------------------------------------------------------------------------------------------------------------------------------------------------------------------------------------------------------------------------|-----|
| Spain       | 3403        | Casanueva, Felipe            | Principal Investigator             | Hospital Provincial de Conxo                             | Ethics Committee of Clinical Research of Fundació de Gestió Sanitària del Hospital de la Santa Creu i Sant Pau<br>Servicio de Farmacología Clínica Pabellon 19<br>Av. Sant Antoni M. Claret, 167<br>Barcelona, Spain 08025                                                   | N/A |
| Spain       | 3401        | Montanana, Carmen Fajardo    | Principal Investigator             | Hospital Universidad De La Ribera                        | Comite Etico<br>Hospital Universitario de la Ribera<br>Carretera de Corbera KM 1<br>Alzira, Valencia, Spain 45600<br><br>Hospital de la Santa Creu i Sant Pau<br>Servicio de Farmacología Clínica<br>Pabellon 19<br>Av. Sant Antoni M. Claret, 167<br>Barcelona, Spain 08025 | N/A |
| Spain       | 3406        | Galvez Moreno, Maria Angeles | Principal Investigator             | Hospital Universitario Reina Sofia                       | Ethics Committee of Clinical Research of Fundació de Gestió Sanitària del Hospital de la Santa Creu i Sant Pau<br>Servicio de Farmacología Clínica Pabellon 19<br>Av. Sant Antoni M. Claret, 167<br>Barcelona, Spain 08025                                                   | N/A |
| Spain       | 3402        | Webb, Susan                  | National Coordinating Investigator | Hospital de la Santa Creu i Sant Pau                     | CEIC Hospital de la Santa Creu i Sant Pau<br>Sant Antoni Maria Claret,<br>167 Barcelona, Spain 08025                                                                                                                                                                         | N/A |
| Sweden      | 4603        | Engström, Britt Edén         | Principal Investigator             | University Hospital                                      | Regional Ethis Committee in Gothenburg<br>Box 401 Gothenburg 405 30 Sweden                                                                                                                                                                                                   | N/A |
| Sweden      | 4602        | Höybye, Charlotte            | Principal Investigator             | Karolinska University Hospital                           | Regional Ethis Committee in Gothenburg<br>Box 401 Gothenburg 405 30 Sweden                                                                                                                                                                                                   | N/A |
| Sweden      | 4601        | Johannsson, Gudmundur        | National Coordinating Investigator | Sahlgrenska University Hospital                          | Regional Ethis Committee in Gothenburg<br>Box 401 Gothenburg 405 30 Sweden                                                                                                                                                                                                   | N/A |
| Switzerland | 4101        | Johannsson, Gudmundur        | Principal Investigator             | University Hospital Basel                                | EKNZ<br>Hebelstrasse 53<br>Basel 4056 Switzerland                                                                                                                                                                                                                            | N/A |
| Turkey      | 9001        | Comlekci, Abdurrahman        | Principal Investigator             | Dokuz Eylul University Medical Faculty                   | Dokuz Eylul University Ethics Committee<br>Dokuz Eylul Universitesi Tip Fakultesi Yeni Dekanlik Binasi<br>Izmir 35340 Turkey                                                                                                                                                 | N/A |
| Turkey      | 9002        | Kadioglu, Pinar              | Principal Investigator             | Istanbul University Medical Faculty                      | Bezmialem Vakif University Clinical Research Ethics Committee<br>Vatan Cad. Adnan Menderes Bulvari<br>Istanbul 34093 Turkey                                                                                                                                                  | N/A |
| Turkey      | 9003        | Tasan, Ertugrul              | Principal Investigator             | Bezmi Alem Vakıf Üniversitesi Endokrinoloji Bölümü Adnan | Dokuz Eylul University Ethics Committee<br>Dokuz Eylul Universitesi Tip Fakultesi Yeni Dekanlik Binasi<br>Izmir 35340 Turkey                                                                                                                                                 | N/A |
| UK          | 4403        | Aylwin, Simon                | National Coordinating Investigator | Kings College Hospital                                   | NRES Committee London-City & East<br>Bristol Research Ethics Committee Centre,<br>Level 3, Block B<br>Whitefriars, Lewins Mead, Level 3, Block B<br>Bristol, UK BS1 2NT                                                                                                      | N/A |

| Country | Site Number | PI                 | Role                   | Site Name                               | CEC                                                                                                                                                                                                                                                                                             | LEC                                                                                                                                                |
|---------|-------------|--------------------|------------------------|-----------------------------------------|-------------------------------------------------------------------------------------------------------------------------------------------------------------------------------------------------------------------------------------------------------------------------------------------------|----------------------------------------------------------------------------------------------------------------------------------------------------|
| UK      | 4406        | Drake, William     | Principal Investigator | St Bartholomew's Hospital               | NRES Committee London-City & East<br>Bristol Research Ethics Committee Centre,<br>Level 3, Block B<br>Whitefriars, Lewins Mead, Level 3, Block B<br>Bristol, UK BS1 2NT                                                                                                                         | N/A                                                                                                                                                |
| UK      | 4404        | Kearney, Tara      | Principal Investigator | Salford Royal NHS Foundation Trust      | Research and Development<br>Department, Salford Royal NHS<br>Foundation Trust<br>Stott Lane<br>Salford, UK M68HD<br><br>NRES Committee London-City & East<br>Bristol Research Ethics Committee Centre,<br>Level 3, Block B<br>Whitefriars, Lewins Mead, Level 3, Block B<br>Bristol, UK BS1 2NT | N/A                                                                                                                                                |
| UK      | 4405        | Ray, David         | Principal Investigator | Manchester Royal Infirmary              | NRES Committee London-City & East<br>Bristol Research Ethics Committee Centre,<br>Level 3, Block B<br>Whitefriars, Lewins Mead, Level 3, Block B<br>Bristol, UK BS1 2NT                                                                                                                         | N/A                                                                                                                                                |
| UK      | 4401        | Trainer, Peter     | Principal Investigator | Christie Hospital                       | NRES Committee London-City & East<br>Bristol Research Ethics Committee Centre,<br>Level 3, Block B<br>Whitefriars, Lewins Mead, Level 3, Block B<br>Bristol, UK BS1 2NT                                                                                                                         | N/A                                                                                                                                                |
| USA     | 1024        | Al-Karadsheh, Amer | Principal Investigator | Endocrine Center of Houston             | Western Institutional Review Board<br>1019 39th Avenue SE, Suite 120<br>Puyallup, WA 98374-2115 USA                                                                                                                                                                                             |                                                                                                                                                    |
| USA     | 1001        | Auchus, Richard    | Principal Investigator | University of Michigan Medical Center   |                                                                                                                                                                                                                                                                                                 | IRBMED<br>2800 Plymouth Road<br>Ann Arbor, MI 48109 USA                                                                                            |
| USA     | 1004        | Biller, Beverly    | Principal Investigator | Massachusetts General Hospital          |                                                                                                                                                                                                                                                                                                 | Partners Human Research Committee<br>116 Huntington Avenue<br>Boston, MA 02116 USA                                                                 |
| USA     | 1016        | Chochinov, Ronald  | Principal Investigator | Coastal Metabolic Research Center       | Western Institutional Review Board<br>1019 39th Avenue SE, Suite 120<br>Puyallup, WA 98374-2115 USA                                                                                                                                                                                             |                                                                                                                                                    |
| USA     | 1019        | De Santis, Pascual | Principal Investigator | Cleveland Clinic Florida                |                                                                                                                                                                                                                                                                                                 | Cleveland Clinic Foundation - Institutional Review Board<br>9500 Euclid Avenue<br>Cleveland, OH 44195 USA                                          |
| USA     | 1006        | Fleseriu, Maria    | Principal Investigator | Oregon Health & Science University      |                                                                                                                                                                                                                                                                                                 | OHSU Research Integrity<br>3181 SW Sam Jackson Park Rd<br>Mail Code L106-R1<br>Portland, OR 97239 USA                                              |
| USA     | 1011        | Geer, Eliza        | Principal Investigator | Icahn School of Medicine at Mount Sinai |                                                                                                                                                                                                                                                                                                 | Program for the Protection of Human Subjects, Mount Sinai<br>School of Medicine<br>One Gustave L. Levy Place<br>Box 1081<br>New York, NY 10029 USA |

| Country | Site Number | PI                     | Role                   | Site Name                                                            | CEC                                                                                                 | LEC                                                                                                                                    |
|---------|-------------|------------------------|------------------------|----------------------------------------------------------------------|-----------------------------------------------------------------------------------------------------|----------------------------------------------------------------------------------------------------------------------------------------|
| USA     | 1026        | Geer, Eliza            | Principal Investigator | Memorial Sloan Kettering Cancer Center                               |                                                                                                     | Memorial Sloan Kettering Cancer Center Institutional Review Board/Privacy Board (IRB/PB)<br>1275 York Avenue<br>New York, NY 10065 USA |
| USA     | 1018        | Ghayee, Hans           | Principal Investigator | University of Florida                                                | Western Institutional Review Board<br>1019 39th Avenue SE, Suite 120<br>Puyallup, WA 98374-2115 USA |                                                                                                                                        |
| USA     | 1007        | Gopalakrishnan, Geetha | Principal Investigator | Rhode Island Hospital, Hallett Center for Diabetes and Endocrinology |                                                                                                     | Lifespan Investigational Review Board<br>Coro West, Suite 1.3<br>One Hoppin Street<br>Providence, RI 02914 USA                         |
| USA     | 1021        | Gordon, Murray         | Principal Investigator | Allegheny Neuroendocrinology Center                                  | Western Institutional Review Board<br>1019 39th Avenue SE, Suite 120<br>Puyallup, WA 98374-2115 USA |                                                                                                                                        |
| USA     | 1014        | Heaney, Anthony        | Principal Investigator | UCLA School of Medicine                                              |                                                                                                     | UCLA Office of the Human Research Protection Program<br>11000 Kinross Avenue<br>Los Angeles, CA 90095 USA                              |
| USA     | 1012        | Iweha, Chioma          | Principal Investigator | Advanced Research                                                    | Western Institutional Review Board<br>1019 39th Avenue SE, Suite 120<br>Puyallup, WA 98374-2115 USA |                                                                                                                                        |
| USA     | 1008        | Kapsner, Patricia      | Principal Investigator | University of New Mexico HSC                                         | Western Institutional Review Board<br>1019 39th Avenue SE, Suite 120<br>Puyallup, WA 98374-2115 USA |                                                                                                                                        |
| USA     | 1003        | Kennedy, Laurence      | Principal Investigator | Cleveland Clinic                                                     |                                                                                                     | Cleveland Clinic Foundation - Institutional Review Board<br>9500 Euclid Avenue/OS-1<br>Cleveland, OH 44195 USA                         |
| USA     | 1009        | Kirschner, Lawrence    | Principal Investigator | Ohio State University Wexner Medical Center                          | Western Institutional Review Board<br>1019 39th Avenue SE, Suite 120<br>Puyallup, WA 98374-2115 USA |                                                                                                                                        |
| USA     | 1023        | Perley, Michael        | Principal Investigator | Advanced Research                                                    | Western Institutional Review Board<br>1019 39th Avenue SE, Suite 120<br>Puyallup, WA 98374-2115 USA |                                                                                                                                        |



| Country | Site Number | PI                 | Roles                  | Site Name                     | CEC                                                                                                 | LEC                                                                                                                    |
|---------|-------------|--------------------|------------------------|-------------------------------|-----------------------------------------------------------------------------------------------------|------------------------------------------------------------------------------------------------------------------------|
| USA     | 1010        | Salvatori, Roberto | Principal Investigator | Johns Hopkins University      |                                                                                                     | Johns Hopkins Institutional Review Boards<br>Reed Hall - B130<br>1620 McElderry Street<br>Baltimore, MD 21205-1911 USA |
| USA     | 1027        | Sheikh-Ali, Mae    | Principal Investigator | East Coast Inst. For Research |                                                                                                     | IRB                                                                                                                    |
| USA     | 1005        | Snyder, Peter      | Principal Investigator | University of Pennsylvania    |                                                                                                     | IRB                                                                                                                    |
| USA     | 1015        | Yuen, Kevin        | Principal Investigator | Swedish Hospital              | Western Institutional Review Board<br>1019 39th Avenue SE, Suite 120<br>Puyallup, WA 98374-2115 USA |                                                                                                                        |
