# Supplementary material for: Levoketoconazole treatment in endogenous Cushing’s syndrome: extended evaluation of clinical, biochemical, and radiologic outcomes
Source: PubMed Central journal article supplement (PMC9716395; doi:10.1530/eje-22-0506), 2022-10-17
Supplement: supplementary_table_2.pdf [file supplementary_table_2.pdf]

**Supplementary Table S2.** Levoketoconazole dose at Month 6 (extended evaluation population)

| Patients by<br>dose, <i>n</i><br>(%) | Levoketoconazole dose at Month 6 of the Maintenance Phase (mg/day) |           |           |           |          |         |         |         | Overall |
|--------------------------------------|--------------------------------------------------------------------|-----------|-----------|-----------|----------|---------|---------|---------|---------|
|                                      | 150                                                                | 300       | 450       | 600       | 750      | 900     | 1050    | 1200    |         |
|                                      | 1 (1.7)                                                            | 15 (25.0) | 12 (20.0) | 11 (18.3) | 7 (11.7) | 4 (6.7) | 5 (8.3) | 5 (8.3) | 60      |
