# Supplementary material for: Levoketoconazole treatment in endogenous Cushing’s syndrome: extended evaluation of clinical, biochemical, and radiologic outcomes
Source: PubMed Central journal article supplement (PMC9716395; doi:10.1530/eje-22-0506), 2022-10-17
Supplement: supplementary_table_3.pdf [file supplementary_table_3.pdf]

**Supplementary Table S3.** Changes from study baseline in mUFC, LNSC, and random serum cortisol levels (extended evaluation population)

| Parameter                                  | Study Baseline |          | Change From Study Baseline to Month 6 |          | <i>P</i> value* | Change From Study Baseline to Month 9 |          | <i>P</i> value* | Change From Study Baseline to Month 12 |          | <i>P</i> value* |
|--------------------------------------------|----------------|----------|---------------------------------------|----------|-----------------|---------------------------------------|----------|-----------------|----------------------------------------|----------|-----------------|
|                                            | Mean (SD)      | <i>n</i> | Mean (SD)                             | <i>n</i> |                 | Mean (SD)                             | <i>n</i> |                 | Mean (SD)                              | <i>n</i> |                 |
| mUFC, nmol/24h                             | 528.1 (438.8)  | 60       | -397.9 (461.4)                        | 54       | <0.0001         | -383.9 (421.7)                        | 49       | <0.0001         | -328.1 (475.6)                         | 44       | <0.0001         |
| LNSC, nmol/L                               | 11.7 (17.1)    | 58       | -5.7 (18.5)                           | 54       | 0.028           | -4.9 (21.7)                           | 47       | 0.131           | -2.9 (24.2)                            | 37       | 0.475           |
| Random serum cortisol, nmol/L <sup>†</sup> | 525.2 (150.0)  | 27       | -71.5 (189.3)                         | 22       | 0.091           | -39.8 (165.8)                         | 23       | 0.262           | -74.3 (225.3)                          | 16       | 0.207           |

\*Two-sided *P* value from the paired t-test performed on the change from study baseline to Months 6, 9, and 12.

<sup>†</sup>No restriction on the clock time samples were collected.

LNSC, late-night salivary cortisol; mUFC, mean urinary free cortisol.
