# Supplementary material for: Levoketoconazole treatment in endogenous Cushing’s syndrome: extended evaluation of clinical, biochemical, and radiologic outcomes
Source: PubMed Central journal article supplement (PMC9716395; doi:10.1530/eje-22-0506), 2022-10-17
Supplement: supplementary_table_4.pdf [file supplementary_table_4.pdf]

Supplementary Table S4. Changes from Month 6 in mUFC and LNSC (extended evaluation population)

| Parameter      | Month 6       |          | Change From<br>Month 6 to Month 9 |          | <i>P</i> value* | Change From<br>Month 6 to Month 12 |          | <i>P</i> value* |
|----------------|---------------|----------|-----------------------------------|----------|-----------------|------------------------------------|----------|-----------------|
|                | Mean (SD)     | <i>n</i> | Mean (SD)                         | <i>n</i> |                 | Mean (SD)                          | <i>n</i> |                 |
| mUFC, nmol/24h | 147.4 (106.4) | 54       | 31.2 (151.5)                      | 44       | 0.1794          | 46.3 (135.4)                       | 39       | 0.0393          |
| LNSC, nmol/L   | 6.1 (5.5)     | 55       | 1.3 (10.2)                        | 44       | 0.3920          | 5.4 (14.2)                         | 36       | 0.0271          |

\*Two-sided *P* value from the paired t-test performed on the change from study baseline to Months 6, 9, and 12.

LNSC, late-night salivary cortisol; mUFC, mean urinary free cortisol.
