# Supplementary material for: Levoketoconazole treatment in endogenous Cushing’s syndrome: extended evaluation of clinical, biochemical, and radiologic outcomes
Source: PubMed Central journal article supplement (PMC9716395; doi:10.1530/eje-22-0506), 2022-10-17
Supplement: supplementary_table_5.pdf [file supplementary_table_5.pdf]

Supplementary Table S5. mUFC concentrations in patients who had prior radiation therapy at Months 6, 9, and 12 (extended evaluation population)

| Patient* | mUFC      |      |           |      |           |      |
|----------|-----------|------|-----------|------|-----------|------|
|          | Month 6   |      | Month 9   |      | Month 12  |      |
|          | nmol/24 h | ×ULN | nmol/24 h | ×ULN | nmol/24 h | ×ULN |
| 1        | 210.5     | 1.5  | 96.0      | 0.7  | 277.4     | 2.0  |
| 2        | 161.3     | 1.2  | 215.4     | 1.6  | 195.1     | 1.4  |
| 3        | 160.2     | 1.2  | 129.4     | 0.9  | 102.3     | 0.7  |
| 4        | 129.8     | 0.9  | 181.1     | 1.3  | 164.7     | 1.2  |
| 5        | 109.7     | 0.8  | 134.3     | 1.0  | 216.6     | 1.6  |
| 6        | 46.6      | 0.3  | 48.4      | 0.4  | 37        | 0.3  |

ULN for UFC = 138 nmol/24 h.

\*One patient did not have mUFC values at Months 6, 9, and 12.

mUFC, mean urinary free cortisol; UFC, urinary free cortisol; ULN, upper limit of normal.
