# Supplementary material for: Levoketoconazole treatment in endogenous Cushing’s syndrome: extended evaluation of clinical, biochemical, and radiologic outcomes
Source: PubMed Central journal article supplement (PMC9716395; doi:10.1530/eje-22-0506), 2022-10-17
Supplement: supplementary_table_6.pdf [file supplementary_table_6.pdf]

Supplementary Table S6. ACTH levels in patients with Cushing’s disease based on mUFC normalization status at Month 12 (extended evaluation population)

|          | <b>Patients With mUFC Normalization<br/>at Month 12</b> |                             | <b>Patients Without mUFC<br/>Normalization at Month 12</b> |                             |
|----------|---------------------------------------------------------|-----------------------------|------------------------------------------------------------|-----------------------------|
|          | <i>n</i>                                                | <b>Mean (SD), ACTH ×ULN</b> | <i>n</i>                                                   | <b>Mean (SD), ACTH ×ULN</b> |
| Month 6  | 14                                                      | 3.0 (2.1)                   | 18                                                         | 2.7 (2.2)                   |
| Month 9  | 15                                                      | 3.3 (2.5)                   | 21                                                         | 2.5 (1.8)                   |
| Month 12 | 15                                                      | 2.7 (2.2)                   | 20                                                         | 2.7 (2.0)                   |

ACTH, adrenocorticotrophic hormone; mUFC, mean urinary free cortisol; ULN, upper limit of normal.
